# Supplementary material
Source: MDPI journal article supplement (https://www.mdpi.com/2071-1050/16/1/464)
Supplement: s1 [file s1]

## Supplementary Information

# Modeling Tetracycline Adsorption onto Blast Furnace Slag Using Statistical and Machine Learning Approaches

Harsha S. Rangappa <sup>1,2</sup>, Phyu Phyu Mon <sup>3</sup>, Indika Herath <sup>4</sup>, Giridhar Madras <sup>5</sup>, Chuxia Lin <sup>2</sup>  
and Challapalli Subrahmanyam <sup>1,3,\*</sup>

<sup>1</sup> Center for Interdisciplinary Programs, Indian Institute of Technology Hyderabad, Kandi, Sangareddy 502285, India

<sup>2</sup> Centre for Regional and Rural Futures, Faculty of Science, Engineering and Built Environment, Deakin University, Burwood, VIC 3125, Australia

<sup>3</sup> Department of Chemistry, Indian Institute of Technology Hyderabad, Kandi, Sangareddy 502285, India

<sup>4</sup> Centre for Regional and Rural Futures, Faculty of Science, Engineering and Built Environment, Deakin University, Waurin Ponds, VIC 3216, Australia

<sup>5</sup> Department of Chemical Engineering, Indian Institute of Technology Hyderabad, Kandi, Sangareddy 502285, India

\* Correspondence: csubbu@iith.ac.in

**Number of pages:** 11

**Number of figures:** 9

**Number of tables:** 6

### Figures:

**Figure.S1.** (a) Artificial Neural Network architecture for modeling the adsorption of TC into GGBS-Ox (b) Random Forest architecture for modeling the adsorption of TC into GGBS-Ox

**Figure. S2.** N<sub>2</sub> adsorption and desorption isotherms of GGBS and GGBS-Ox

**Figure. S3.** N<sub>2</sub> adsorption/desorption curves of different adsorbents (insert: pore size distribution). (Page S10).

**Figure. S3.** (a) Particle size distribution by dynamic light scattering (DLS) of GGBS (b) Particle size distribution by dynamic light scattering (DLS) of GGBS-Ox

**Figure. S4.** (a) The effect of adsorbent dosage on percentage removal (b) the effect of pollutant concentration on the percentage removal.

**Figure. S5.** (a) Comparison of predicted and actual results for RSM (b) Comparison of predicted and actual results for ANN (c) Comparison of predicted and actual results for RF

**Figure. S6.** Perturbation plot for TC removal efficiency.

**Figure. S7.** Kinetics of adsorption of TC (a) First-order kinetics (b) Second-order kinetics.

**Figure. S8.** Effect of the temperature on the adsorption capacity of TC by GGBS-Ox.

**Fig. S9.** Thermodynamic parameters of TC adsorption by GGBS-Ox.

### **Tables:**

**Table S1.** Levels of parameters for BBD experiments.

**Table S2.** Comparison of RSM, ANN, and RF

**Table S3.** Calculation of adsorption parameters and regression coefficients

**Table S4.** The parameters and regression coefficients for pseudo-first order and pseudo-second order are listed below.

**Table S5:** The parameters and regression coefficients for Langmuir, Freundlich, DR isotherm and McKay external diffusion model

**Table S6.** Thermodynamic conditions for GGBS-Ox adsorption at different temperatures.

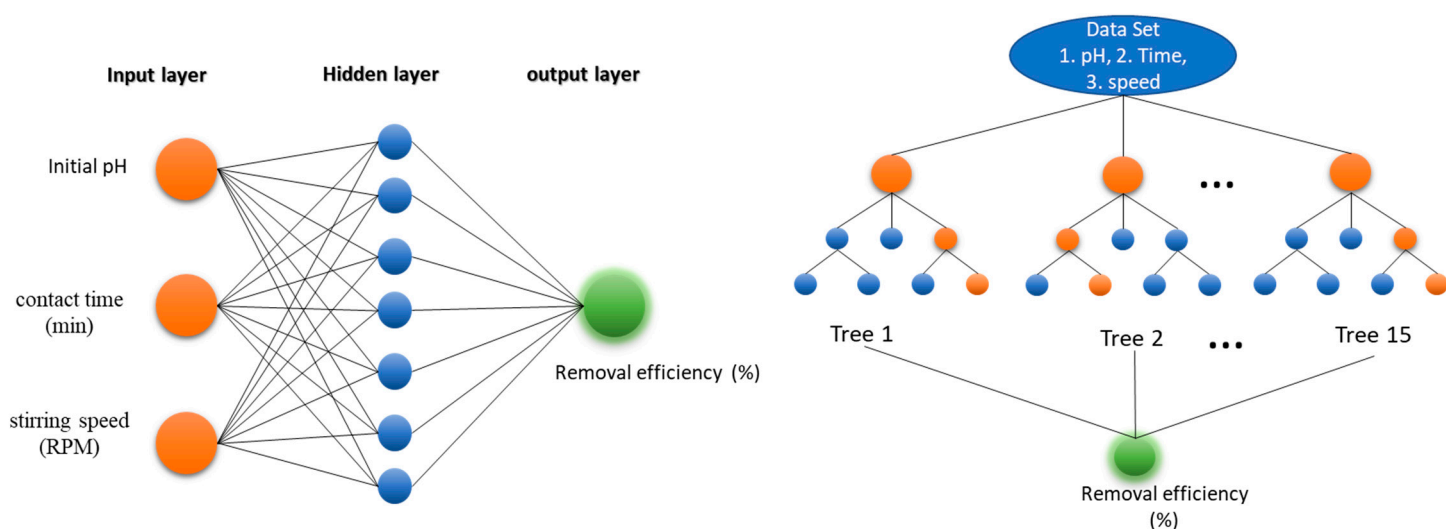

**Figure. S1.** (a) Artificial Neural Network architecture for modeling the adsorption of TC into GGBS-Ox (b) Random Forest architecture for modeling the adsorption of TC into GGBS-Ox

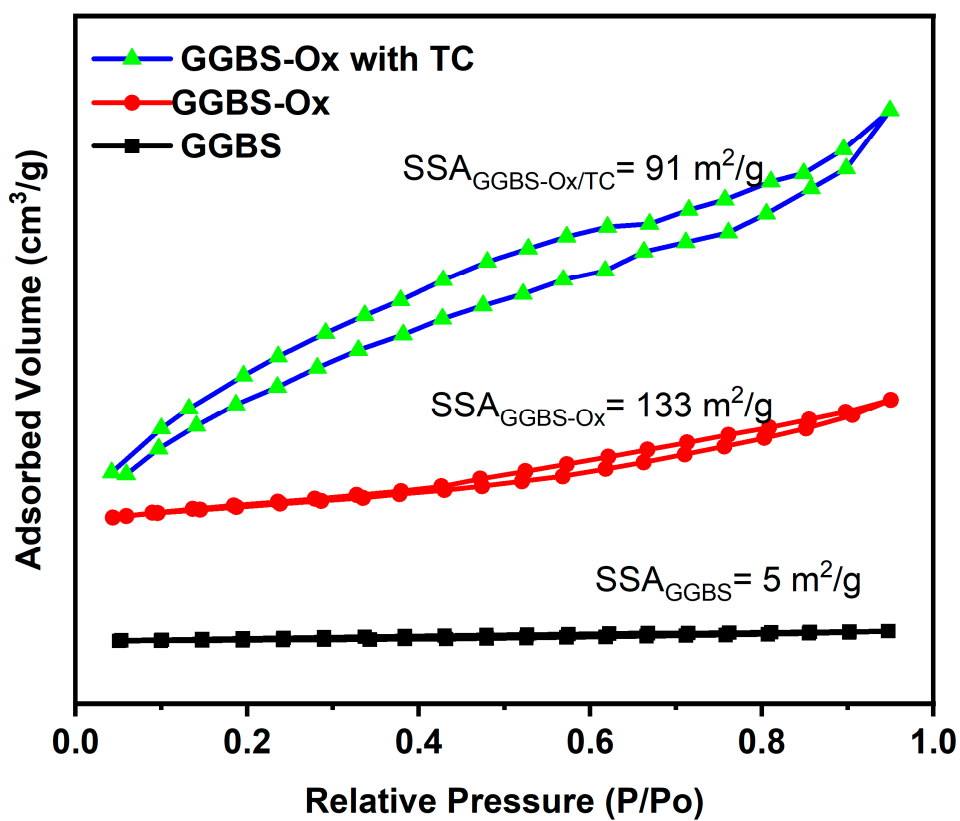

**Figure. S2.**  $N_2$  adsorption and desorption isotherms of GGBS and GGBS-Ox

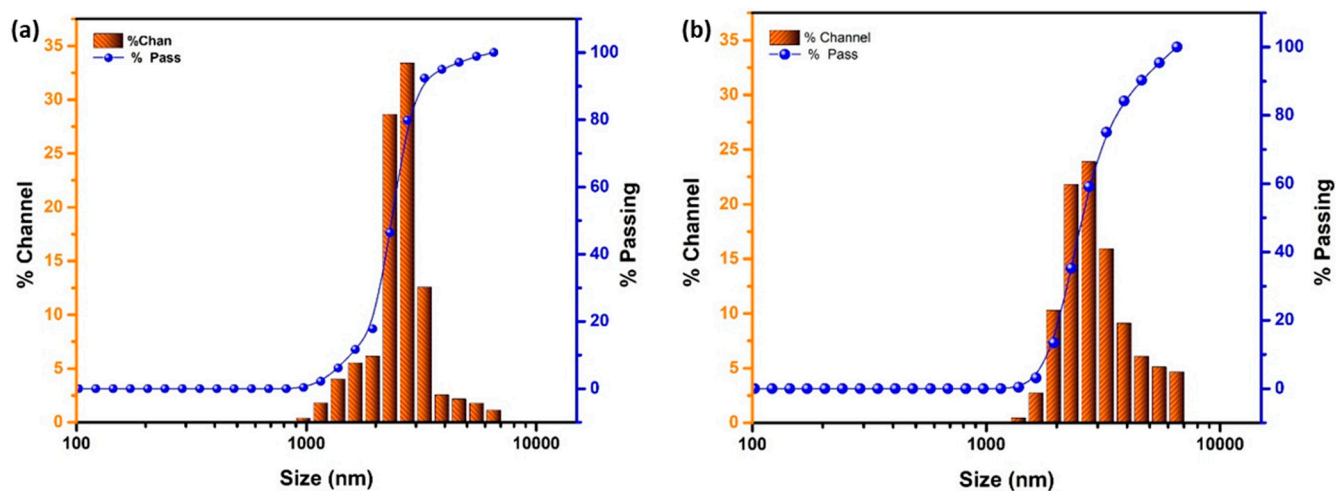

**Figure. S3.** (a) Particle size distribution by dynamic light scattering (DLS) of GGBS (b) Particle size distribution by dynamic light scattering (DLS) of GGBS-Ox

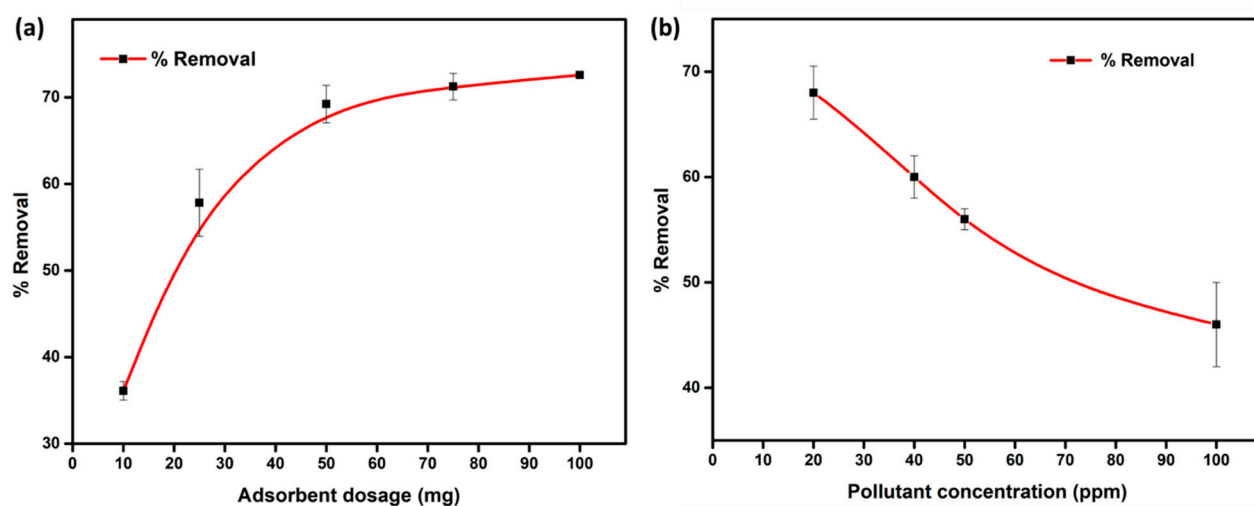

**Figure. S4.** (a)The effect of adsorbent dosage on percentage removal (b) the effect of pollutant concentration on the percentage removal.

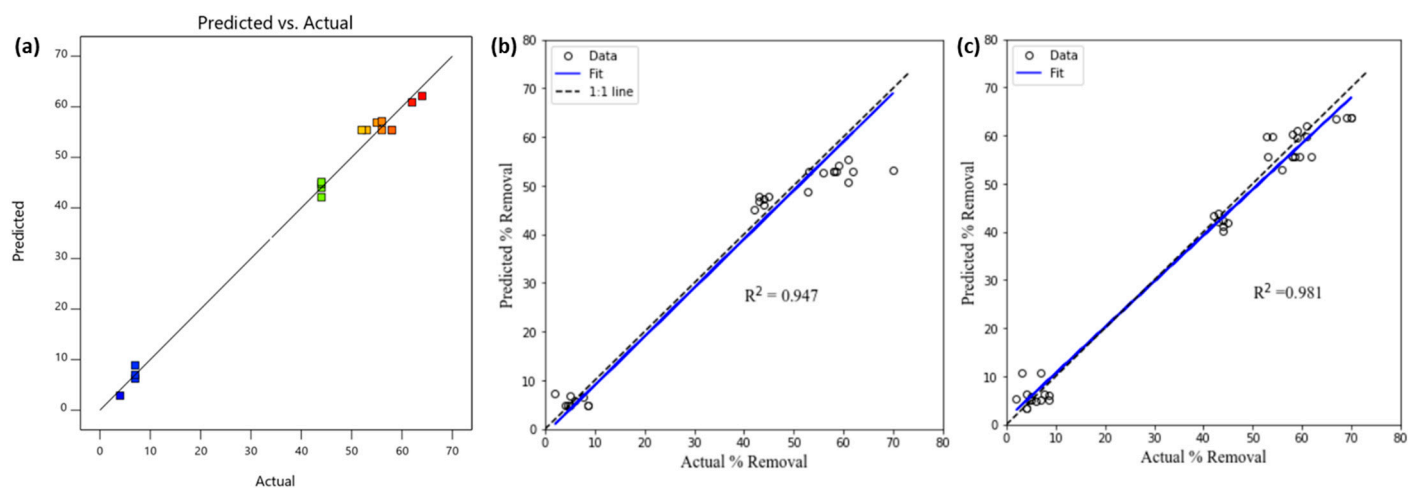

**Figure. S5.** (a) Comparison of predicted and actual results for RSM (b) Comparison of predicted and actual results for ANN (c) Comparison of predicted and actual results for RF

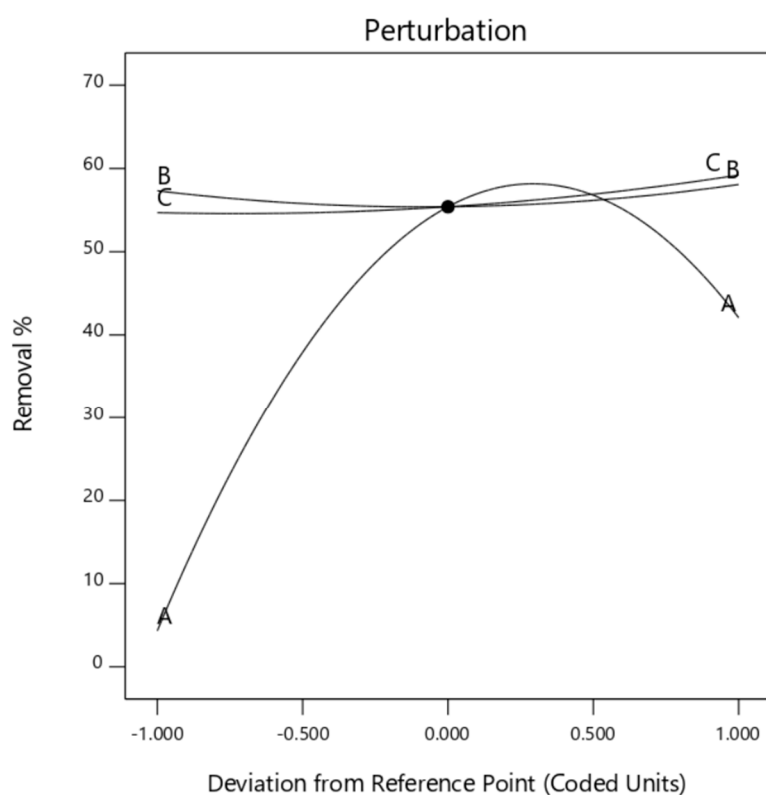

**Fig. S6.** Perturbation plot for TC removal efficiency.

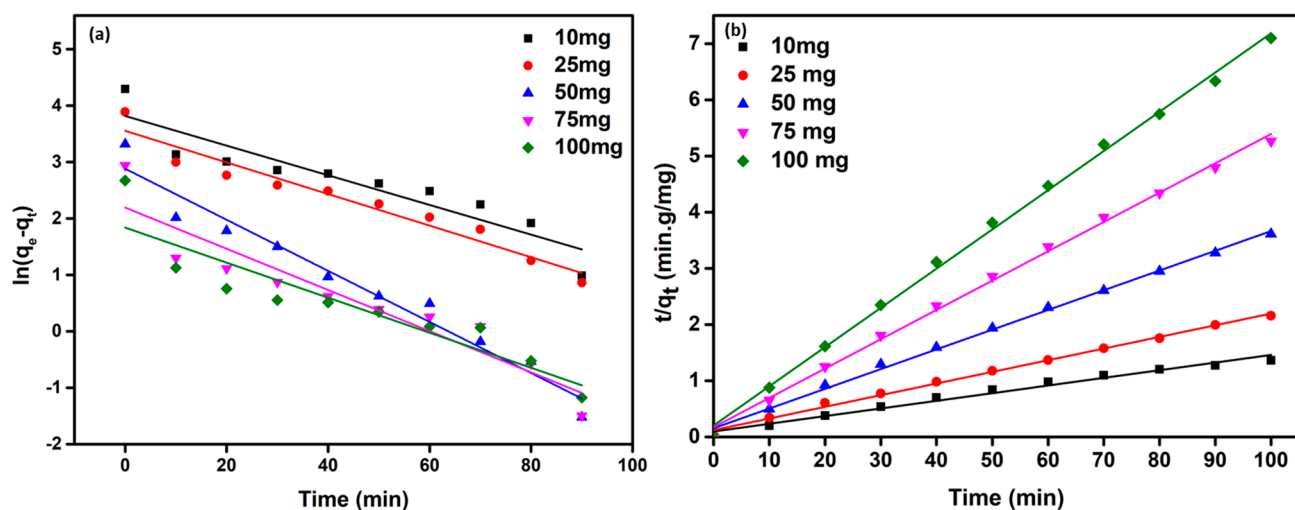

**Figure S7.** Kinetics of adsorption of TC ( $C_0 = 40$  ppm, 50ml) (a) First-order kinetics (b) Second-order kinetics.

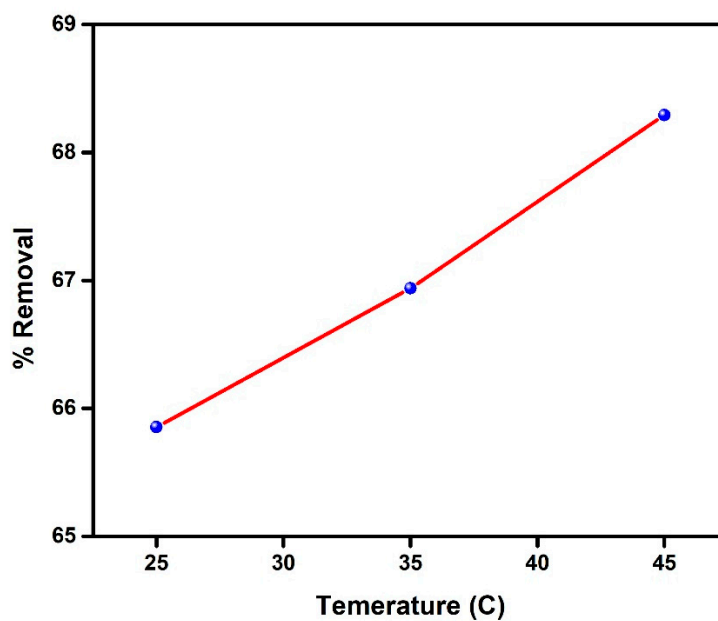

**Figure. S8.** Effect of the temperature on the adsorption capacity of TC by GGBS-Ox.

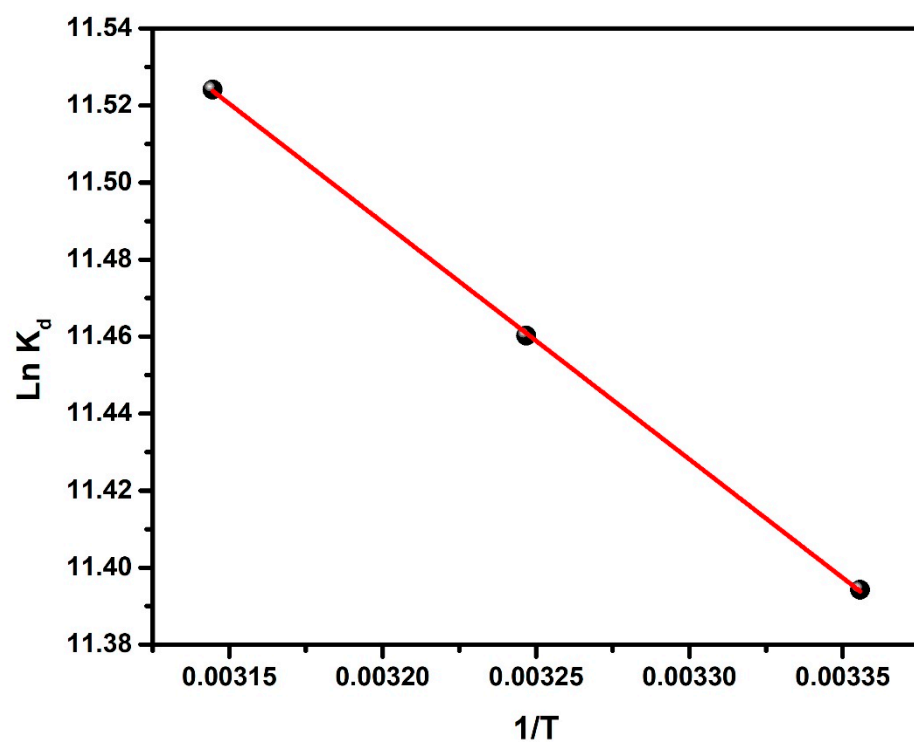

**Figure S9.** Thermodynamic parameters of TC adsorption by GGBS-Ox.

**Table S1**

Levels of parameters for BBD experiments.

| Independent<br>parameters | Coded and uncoded values |     |     |
|---------------------------|--------------------------|-----|-----|
|                           | -1                       | 0   | +1  |
| Initial pH                | 2                        | 7   | 12  |
| Contact time (min)        | 10                       | 50  | 90  |
| Stirring speed (rpm)      | 100                      | 300 | 500 |

**Table S2**

Comparison of RSM, ANN, and RF

| Parameter |                |      |      |
|-----------|----------------|------|------|
| Model     | R <sup>2</sup> | RMSE | MAE  |
| BBD       | 0.98           | 1.78 | 1.53 |
| ANN       | 0.95           | 5.46 | 4.12 |
| RF        | 0.98           | 3.43 | 2.81 |

**Table S3.** Calculation of adsorption parameters and regression coefficients

| Kinetic model      | Initial concentration | Parameter      |                | Regression     |
|--------------------|-----------------------|----------------|----------------|----------------|
|                    | (ppm)                 |                |                | coefficient    |
| Pseudo-first order |                       | q <sub>e</sub> | K <sub>1</sub> | R <sup>2</sup> |
|                    | 20                    | 15.95          | 0.027±0.002    | 0.9208         |
|                    | 50                    | 33.08          | 0.031±0.002    | 0.9335         |



|                         |              |                |                 |                |
|-------------------------|--------------|----------------|-----------------|----------------|
| Pseudo-second order     | 100          | 53.60          | 0.022±0.003     | 0.8015         |
|                         |              | q <sub>e</sub> | K <sub>2</sub>  | R <sup>2</sup> |
|                         | 20           | 15.50          | 0.0621±0.001    | 0.9973         |
|                         | 50           | 32.19          | 0.0298±0.001    | 0.9959         |
| Intraparticle diffusion | 100          | 50.00          | 0.019±0.001     | 0.9955         |
|                         |              | C <sub>i</sub> | K <sub>id</sub> | R <sup>2</sup> |
|                         | 20 (step 1)  | 12.17±0.155    | 0.34 ± 0.017    | 0.9842         |
|                         | 20 (step 2)  | 5.35±0.79      | 1.96± 0.22      | 0.9623         |
|                         | 50 (step 1)  | 9.55±1.76      | 4.20±0.5        | 0.9588         |
|                         | 50 (step 2)  | 23.57±1.19     | 0.93±0.13       | 0.8860         |
|                         | 100 (step 1) | 7.99±1.08      | 8.33±0.30       | 0.9960         |
|                         | 100 (step 2) | 33.92±1.88     | 1.87±0.21       | 0.9267         |

**Table S4.** The parameters and regression coefficients for pseudo-first order and pseudo-second order are listed below.

| Kinetic model       | Adsorbent dosage<br>(mg) | Parameter      |                | Regression<br>coefficient |
|---------------------|--------------------------|----------------|----------------|---------------------------|
| Pseudo-first order  |                          | q <sub>e</sub> | K <sub>1</sub> | R <sup>2</sup>            |
|                     | 10                       | 73.40          | 0.026±0.003    | 0.8441                    |
|                     | 25                       | 49             | 0.028±0.002    | 0.9390                    |
|                     | 50                       | 27.70          | 0.045±0.003    | 0.9565                    |
|                     | 75                       | 19.00          | 0.036±0.004    | 0.8659                    |
|                     | 100                      | 14.51          | 0.031±0.004    | 0.8272                    |
| Pseudo-second order |                          | q <sub>e</sub> | K <sub>2</sub> | R <sup>2</sup>            |
|                     | 10                       | 73.40          | 0.0136         | 0.9803                    |
|                     | 25                       | 49             | 0.0200         | 0.9944                    |

|     |       |        |        |
|-----|-------|--------|--------|
| 50  | 27.70 | 0.0371 | 0.9964 |
| 75  | 19.00 | 0.0530 | 0.9968 |
| 100 | 14.51 | 0.0680 | 0.9974 |

**Table S5.** The parameters and regression coefficients for Langmuir, Freundlich, DR isotherm and McKay external diffusion model

| Isotherm model | Parameters                  |                                                           | Regression coefficient |
|----------------|-----------------------------|-----------------------------------------------------------|------------------------|
| Langmuir       | $q_m$ : 76.3942             | $k_L$ : 0.0452                                            | 0.9820                 |
| Freundlich     | $n$ : 1.76                  | $k_F$ : 6.18                                              | 0.9312                 |
| DR             | $B$ : $7.53 \times 10^{-6}$ | $E$ : 257 kJ/mol                                          | 0.8601                 |
| McKay          | Concentration               | Diffusion coefficient, $\text{cm}^2/\text{s}$ ( $\beta$ ) |                        |
|                | 20                          | $3.812 \times 10^{-9}$                                    | 0.97                   |
|                | 50                          | $2.310 \times 10^{-9}$                                    | 0.84                   |
|                | 100                         | $1.564 \times 10^{-9}$                                    | 0.84                   |

**Table S6.** Thermodynamic conditions for GGBS-Ox adsorption at different temperatures.

| Temperature<br>(K) | 1/T      | $\ln K_d$ | $\Delta G^\circ$ (kJ/mol) | $\Delta H^\circ$<br>(kJ/mol) | $\Delta S^\circ$<br>(kJ/mol.K) | $R^2$  |
|--------------------|----------|-----------|---------------------------|------------------------------|--------------------------------|--------|
| 298                | 0.003356 | 11.3942   | -28.2299                  |                              |                                |        |
| 308                | 0.003247 | 11.4602   | -29.3462                  | 5.1169                       | 0.1119                         | 0.9998 |
| 318                | 0.003145 | 11.5241   | -30.4680                  |                              |                                |        |
